# Supplementary material for: Microstructure Evolution in Plastic Deformed Bismuth Telluride for the Enhancement of Thermoelectric Properties
Source: MDPI journal article supplement (doi:10.3390/ma15124204), 2022-06-14
Supplement: s1 [file s1]

## Supplementary Material

### Microstructure evolution in plastic deformed bismuth telluride for the enhancement of thermoelectric properties

Haishan Shen<sup>1</sup>, In-Yea Kim<sup>2</sup>, Jea-Hong Lim<sup>2</sup>, Hong-Baek Cho<sup>1</sup>, Yong-Ho Choa<sup>1,\*</sup>

<sup>1</sup>Department of Materials Science and Chemical Engineering, Hanyang University, 55 Hanyangdaehak-ro, Sangnok-gu, Ansan, Gyeonggi-do 15588, Republic of Korea.

<sup>2</sup>Department of Materials Science and Engineering, Gachon University, 1342 Seongnamdaero, Sujeong-gu, Seongnam-si, Gyeonggi-do 13120, Republic of Korea.

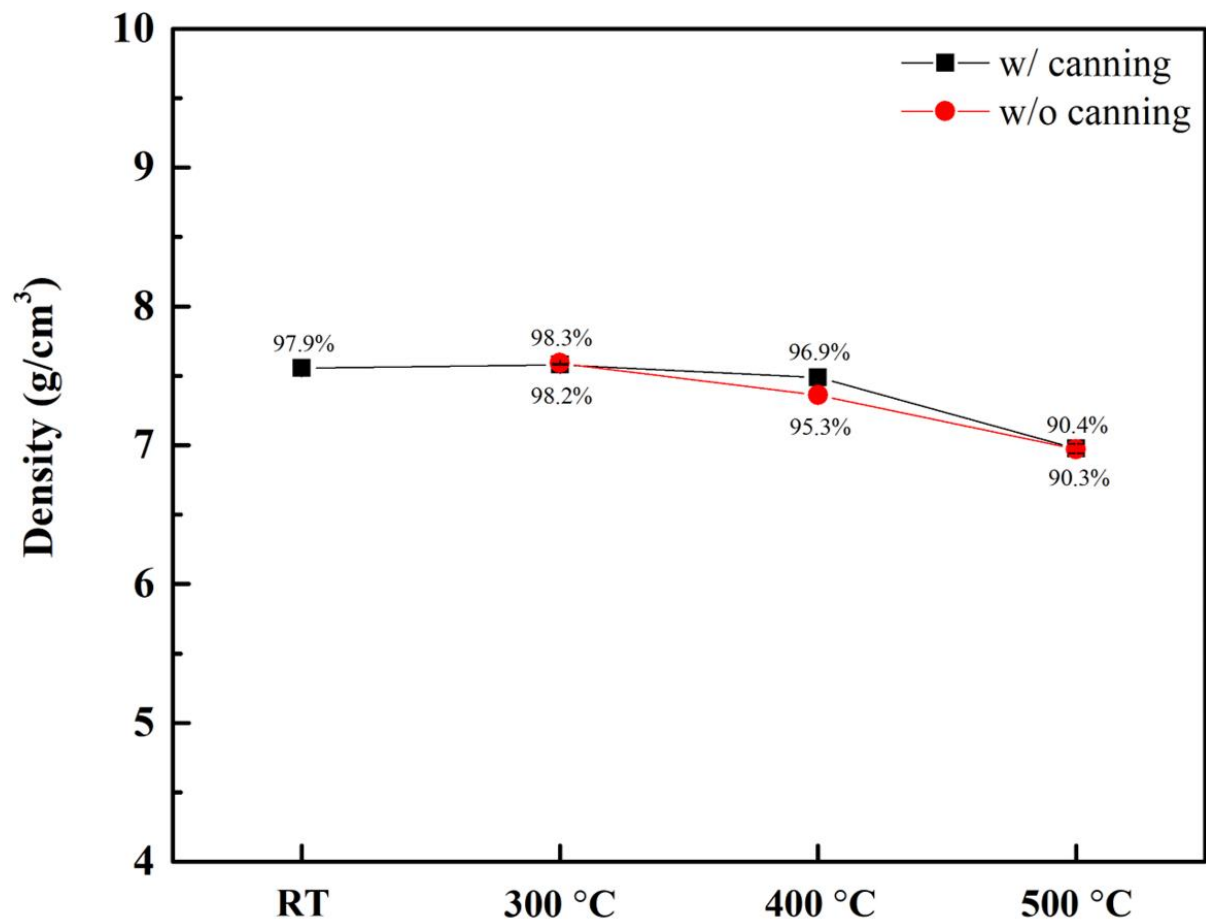

**Figure S1.** Comparison of pellet densities at RT, 300, 400, and 500 °C.

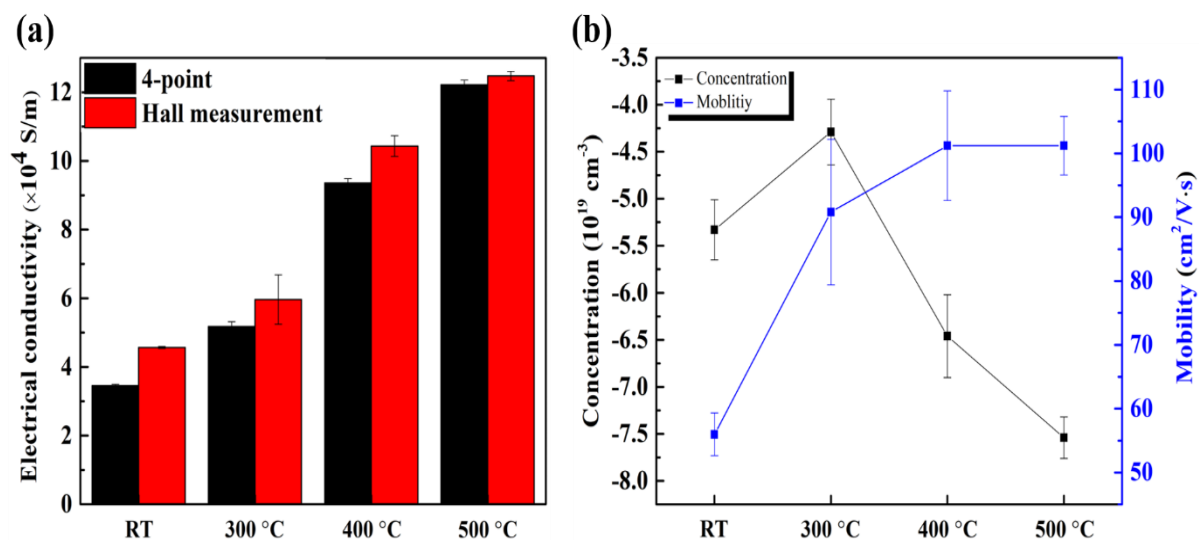

**Figure S2.** (a) comparison of 4-point and hall measurement about electrical conductivity and (b) carrier concentration and mobility from hall measurement.

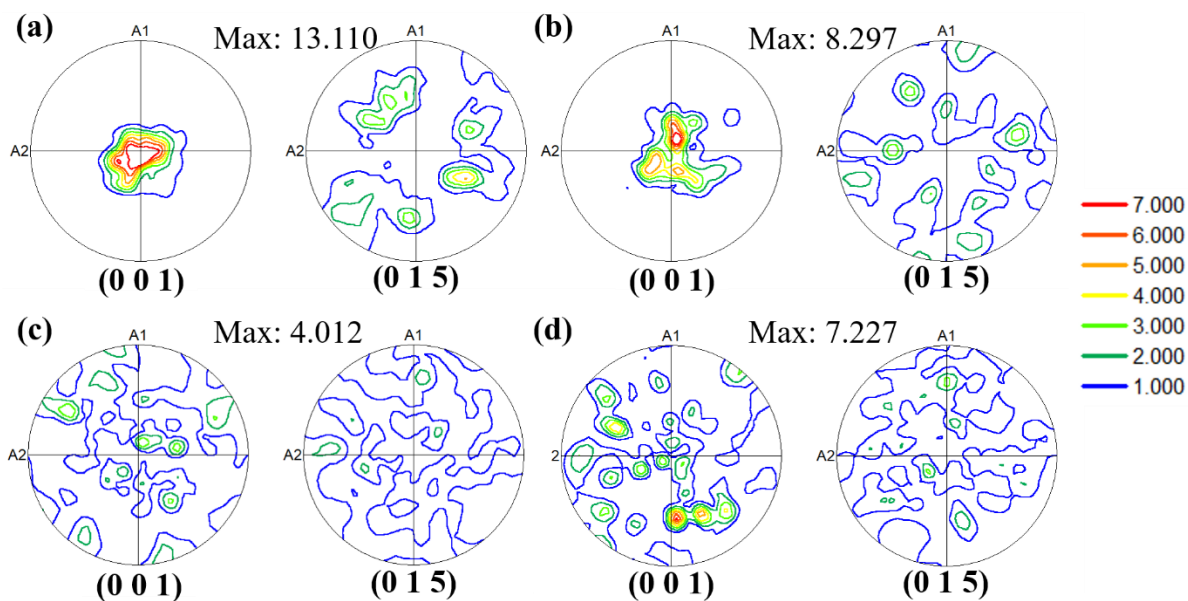

**Figure S3.** EBSD pole figure images of samples for (0 0 1) and (0 1 5) planes at (a) RT, (b) 300 °C, (c) 400 °C, and (d) 500 °C. Electron diffraction intensity is represented by color marks in scale bar.

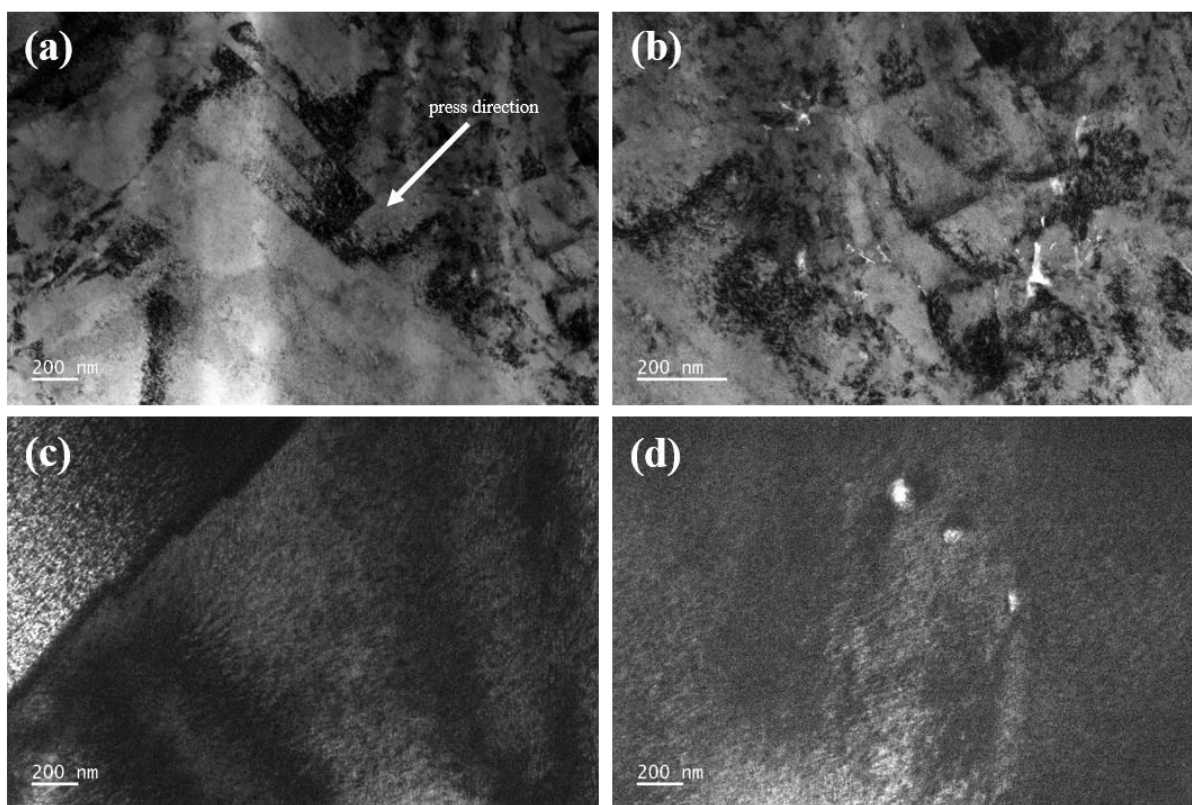

**Figure S4.** TEM images of cold-sintered samples (a–b) at RT and (c–d) annealed at 500 °C with canning package.

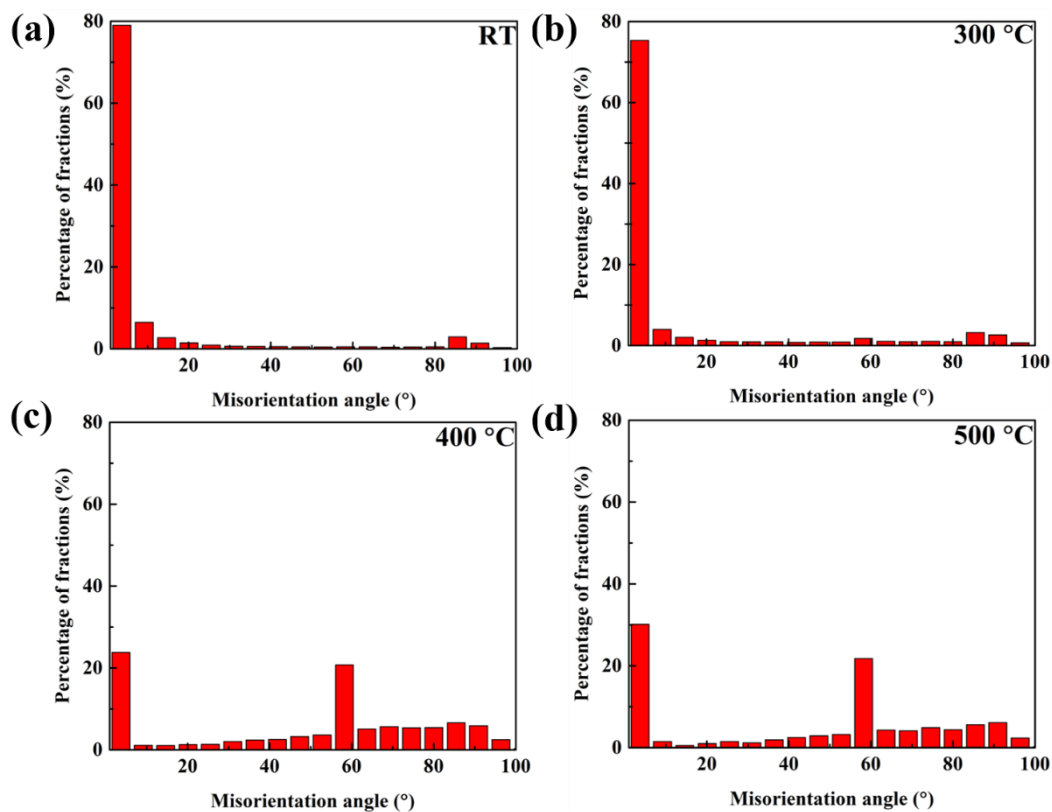

**Figure S5.** Misorientation angle distribution based on EBSD data at RT, 300, 400, and 500 °C.
